# Supplementary material for: Significant reduction in the optical band-gap and defect assisted magnetic response in Fe-doped anatase TiO2nanocrystals as dilute magnetic semiconductors
Source: Royal Society of Chemistry journal article supplement (doi:10.1039/c9nj00275h), 2019-01-01
Supplement: c9nj00275h1.pdf [file c9nj00275h1.pdf]

## **Supplementary Information**

### **Significant reduction in the optical band-gap and defect assisted magnetic response in Fe-doped anatase TiO<sub>2</sub> nanocrystals as dilute magnetic semiconductors**

V. R. Akshay<sup>1,2</sup>, B. Arun<sup>1,2</sup>, Guruprasad Mandal<sup>3</sup>, Anupama Chanda<sup>4</sup> and M.Vasundhara<sup>1,2\*</sup>

<sup>1</sup>*Materials Science and Technology Division, CSIR-National Institute for Interdisciplinary Science and Technology, Trivandrum -695 019, India.*

<sup>2</sup>*Academy of Scientific and Innovative Research (AcSIR), CSIR-Human Resource Development Centre, Ghaziabad, Uttarpradesh, India.*

<sup>3</sup>*Centre for Rural and Cryogenic Technologies, Jadavpur University, Kolkata-700032*

<sup>4</sup>*Department of Physics, Dr Hari Singh Gour Central University, Sagar, India-470003*

\*Corresponding authors: [mvas@niist.res.in](mailto:mvas@niist.res.in), [vasu.mutta@gmail.com](mailto:vasu.mutta@gmail.com)

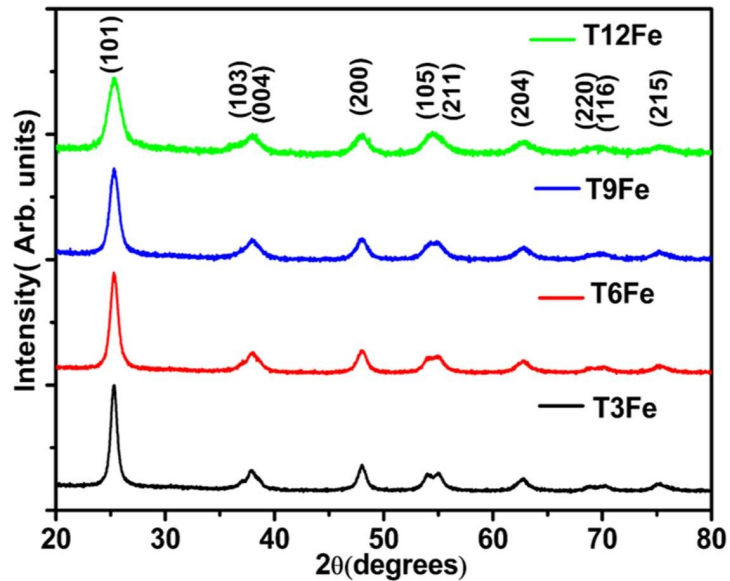

**Fig.S1:** XRD patterns of T3Fe, T6Fe, T9Fe and T12Fe

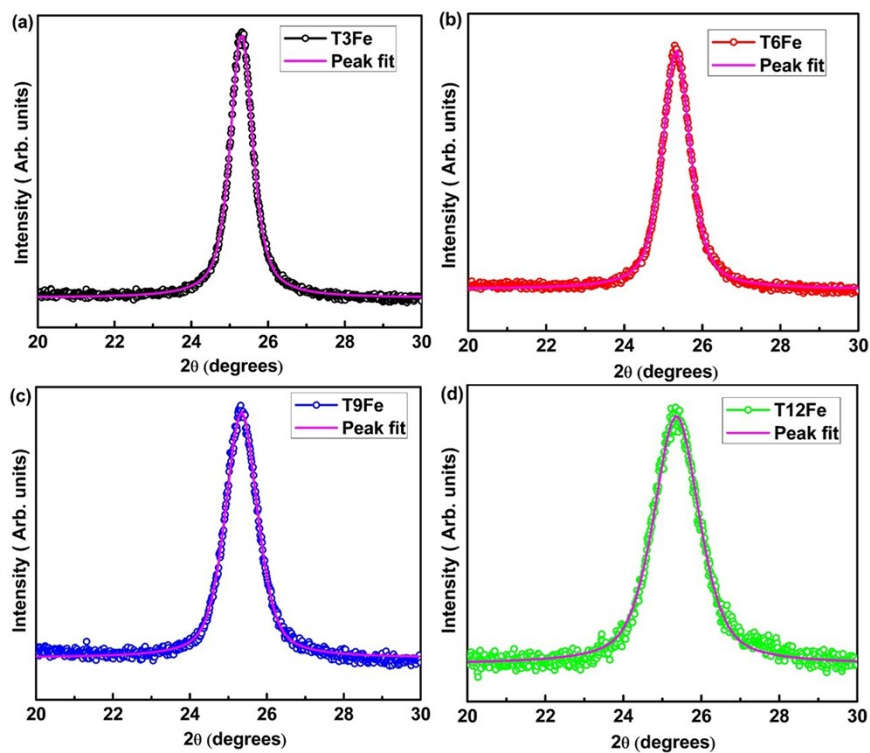

**Fig.S2:** Estimation of FWHM from the most intense (101) peak of (a) T3Fe (b) T6Fe (c) T9Fe and (d) T12Fe

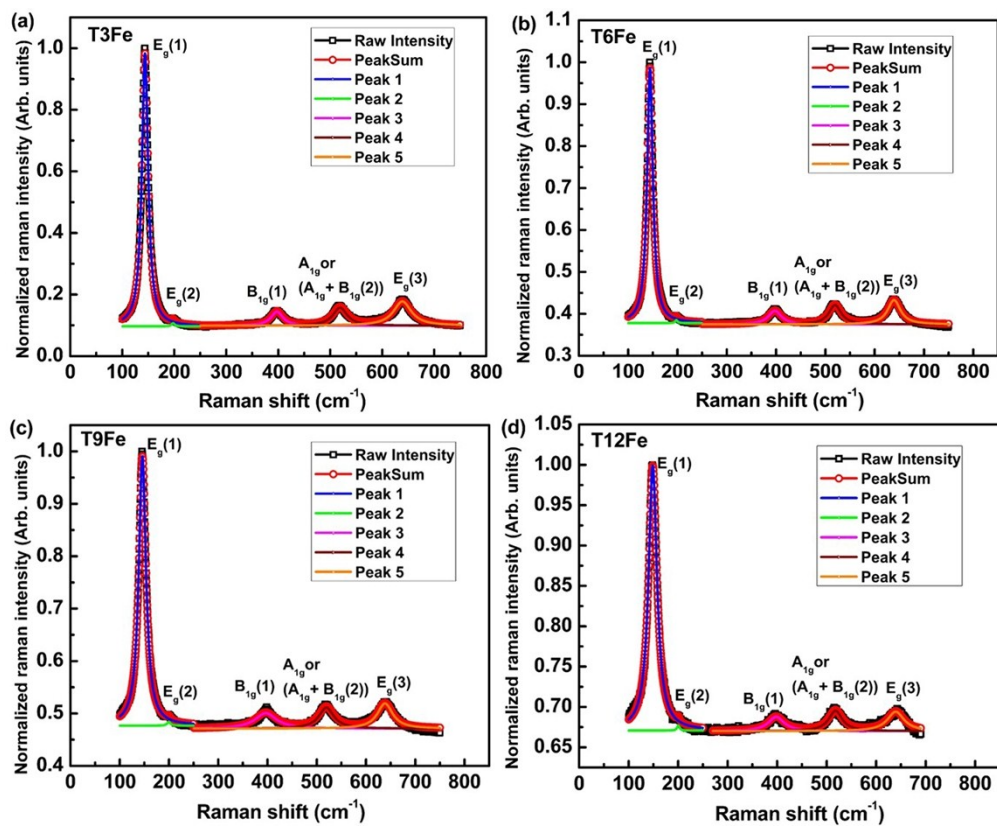

**Fig.S3:** Deconvoluted Raman spectra of (a) T3Fe (b) T6Fe (c) T9Fe (d) T12Fe

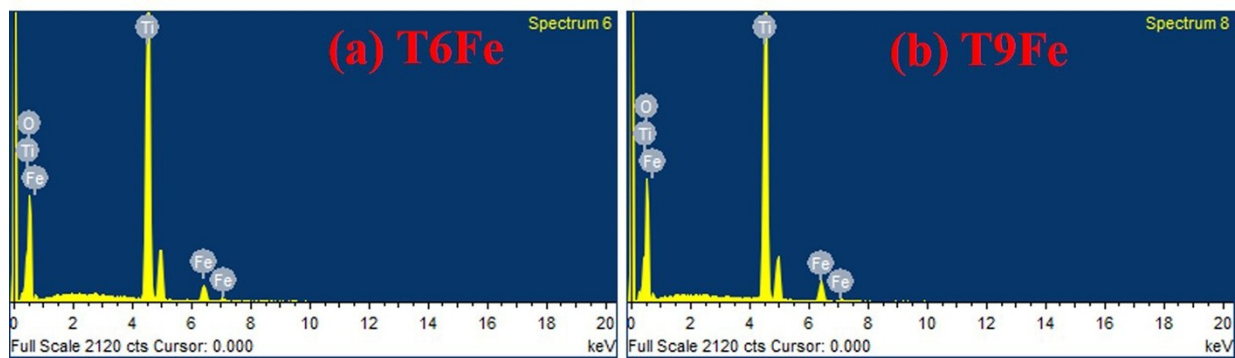

**Fig.S4:** SEM-EDS spectra of (a) T6Fe (b) T9Fe

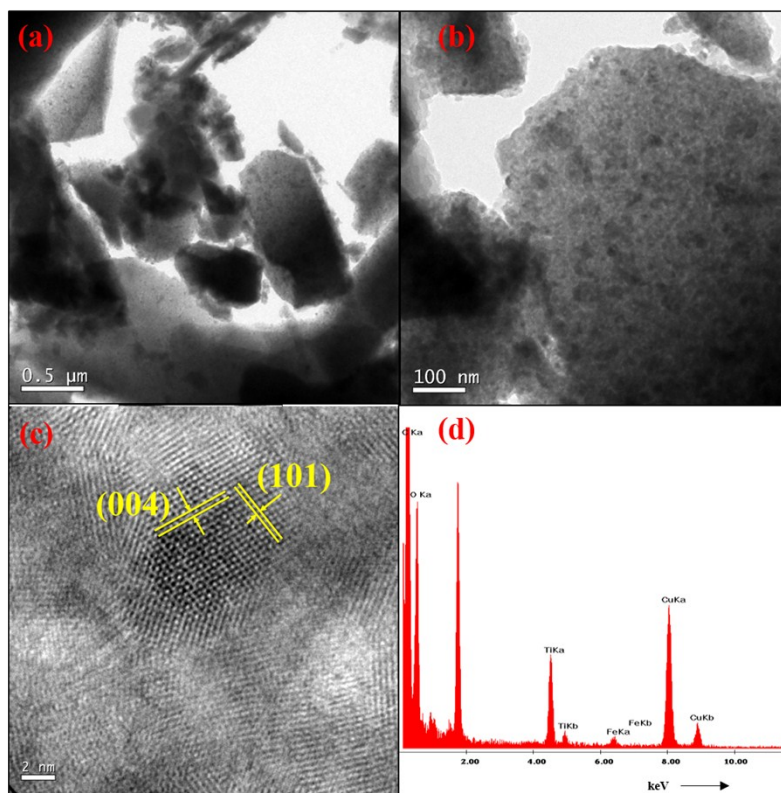

**Fig.S5:** (a), (b) Sheet formation in T3Fe samples (c) HR-TEM image showing the crystalline nature of stacked T3Fe sheets (d) EDS spectra of T3Fe from HR-TEM

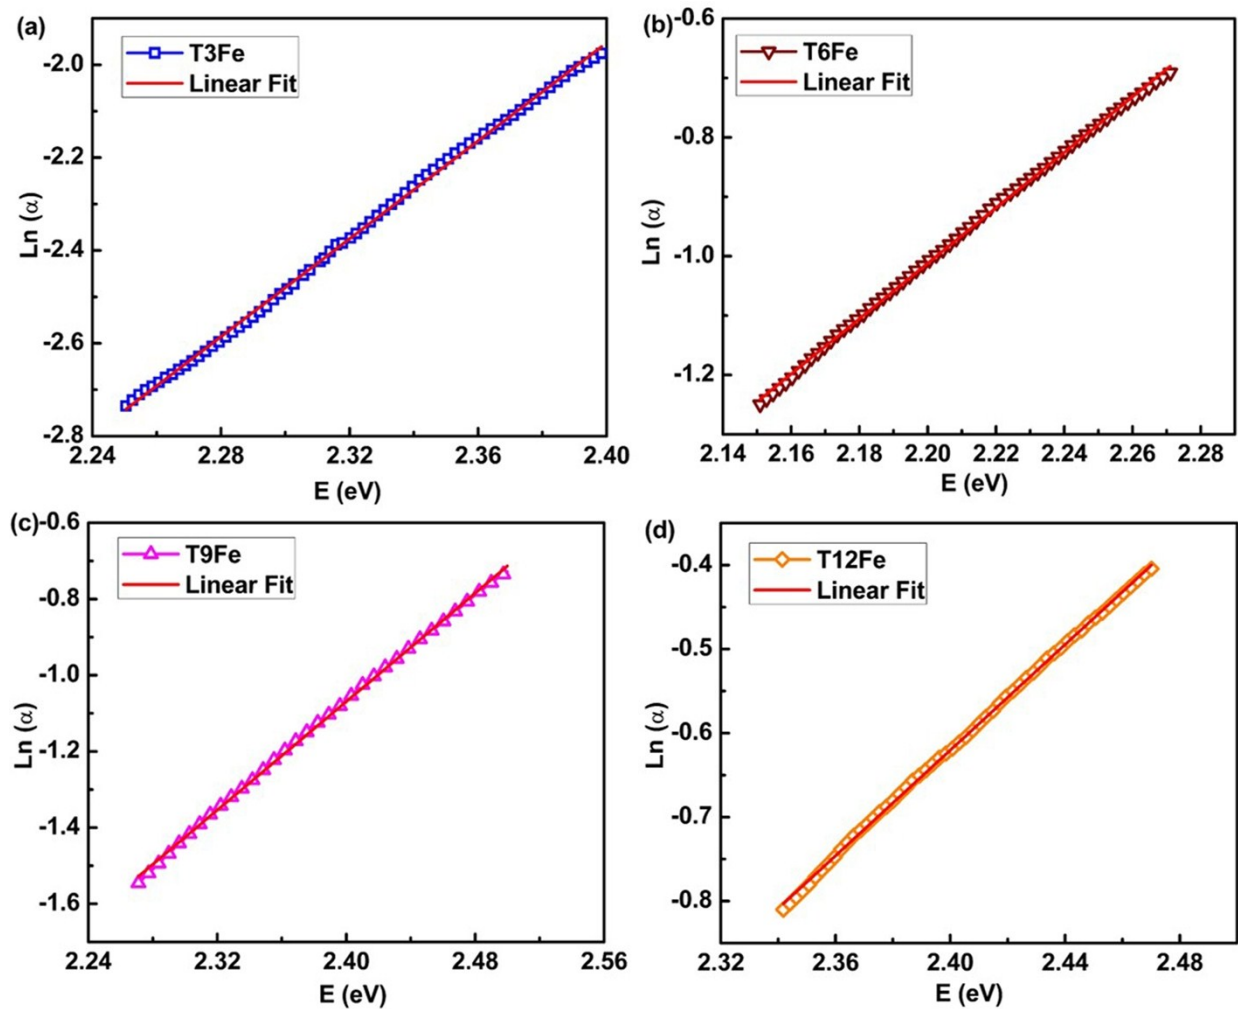

**Fig.S6:** Plot for Urbach energy estimation of (a) T3Fe, (b) T6Fe (c) T9Fe and (d) T12Fe

**Table S1:** Refinement parameters obtained for pristine and Fe-doped TiO<sub>2</sub> nanocrystals

| Compound                   | Pristine TiO <sub>2</sub> | T3Fe       | T6Fe       | T9Fe       | T12Fe      |
|----------------------------|---------------------------|------------|------------|------------|------------|
| Phase                      | Anatase                   |            |            |            |            |
| Crystal Structure          | Tetragonal                |            |            |            |            |
| Space Group                | I 41/a m d                |            |            |            |            |
| <b>Lattice Parameters</b>  |                           |            |            |            |            |
| a(Å)                       | 3.7901 (1)                | 3.7834 (5) | 3.7810 (2) | 3.7793 (3) | 3.7772 (5) |
| c(Å)                       | 9.4923 (3)                | 9.4902 (1) | 9.4881 (4) | 9.4854 (1) | 9.4843 (2) |
| Volume (Å) <sup>3</sup>    | 136.35 (2)                | 135.81 (1) | 135.64 (3) | 135.45 (1) | 135.29 (4) |
| <b>Residual Parameters</b> |                           |            |            |            |            |
| R <sub>p</sub>             | 4.56                      | 4.19       | 4.16       | 4.35       | 4.14       |
| R <sub>wp</sub>            | 5.77                      | 5.23       | 5.44       | 5.33       | 5.39       |
| χ <sup>2</sup>             | 1.89                      | 1.47       | 1.46       | 1.47       | 1.47       |

**Table S2:** ED-XRFS data obtained for T3Fe, T6Fe, T9Fe and T12Fe

| Compound | Percentage of elemental oxide                                 |
|----------|---------------------------------------------------------------|
| T3Fe     | 96.9% TiO <sub>2</sub> + 3.1% Fe <sub>2</sub> O <sub>3</sub>  |
| T6Fe     | 93.9% TiO <sub>2</sub> + 6.1% Fe <sub>2</sub> O <sub>3</sub>  |
| T9Fe     | 90.9% TiO <sub>2</sub> + 9.1% Fe <sub>2</sub> O <sub>3</sub>  |
| T12Fe    | 87.8% TiO <sub>2</sub> + 12.2% Fe <sub>2</sub> O <sub>3</sub> |

**Table S3** : Band Gaps and Urbach energy estimated for Fe-doped TiO<sub>2</sub> samples

| <b>Sample</b> | <b>Band gap<br/>(eV)</b> | <b>Urbach<br/>energy (meV)</b> |
|---------------|--------------------------|--------------------------------|
| <b>T3Fe</b>   | 2.30                     | 190                            |
| <b>T6Fe</b>   | 1.89                     | 214                            |
| <b>T9Fe</b>   | 1.80                     | 281                            |
| <b>T12Fe</b>  | 1.76                     | 318                            |
